# Supplementary material
Source: PubMed Central journal article supplement (PMC5498804)
Supplement: mmc1.pdf [file mmc1.pdf]

YMTHE, Volume 25

## **Supplemental Information**

### **Orally Targeted Delivery of Tripeptide KPV via Hyaluronic Acid-Functionalized Nanoparticles Efficiently Alleviates Ulcerative Colitis**

**Bo Xiao, Zhigang Xu, Emilie Viennois, Yuchen Zhang, Zhan Zhang, Mingzhen Zhang, Moon Kwon Han, Yuejun Kang, and Didier Merlin**

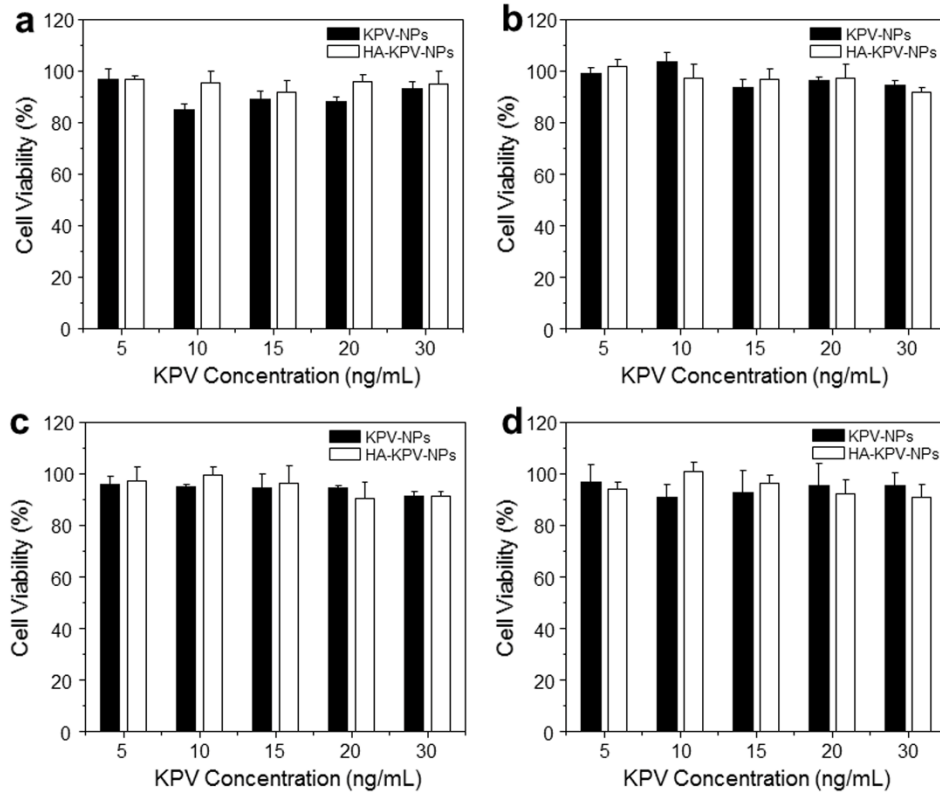

**Figure S1. *In vitro* cytotoxicity assays of KPV-NPs and HA-KPV-NPs against (a) Colon-26 cells for 24 h, (b) Raw 264.7 macrophages for 24 h, (c) Colon-26 cells for 48 h and (d) Raw 264.7 macrophages for 48 h.** Triton X-100 was used as the positive control to produce a maximum cell death rate (100%). Cell culture medium was used as a negative control (death rate defined as 0%). Toxicity is given as the percentage of viable cells remaining after treatment. Each point represents the mean  $\pm$  S.E.M. (n=5). Statistical significance was assessed using Student's *t*-test (\* $P$ <0.05 and \*\* $P$ <0.01).

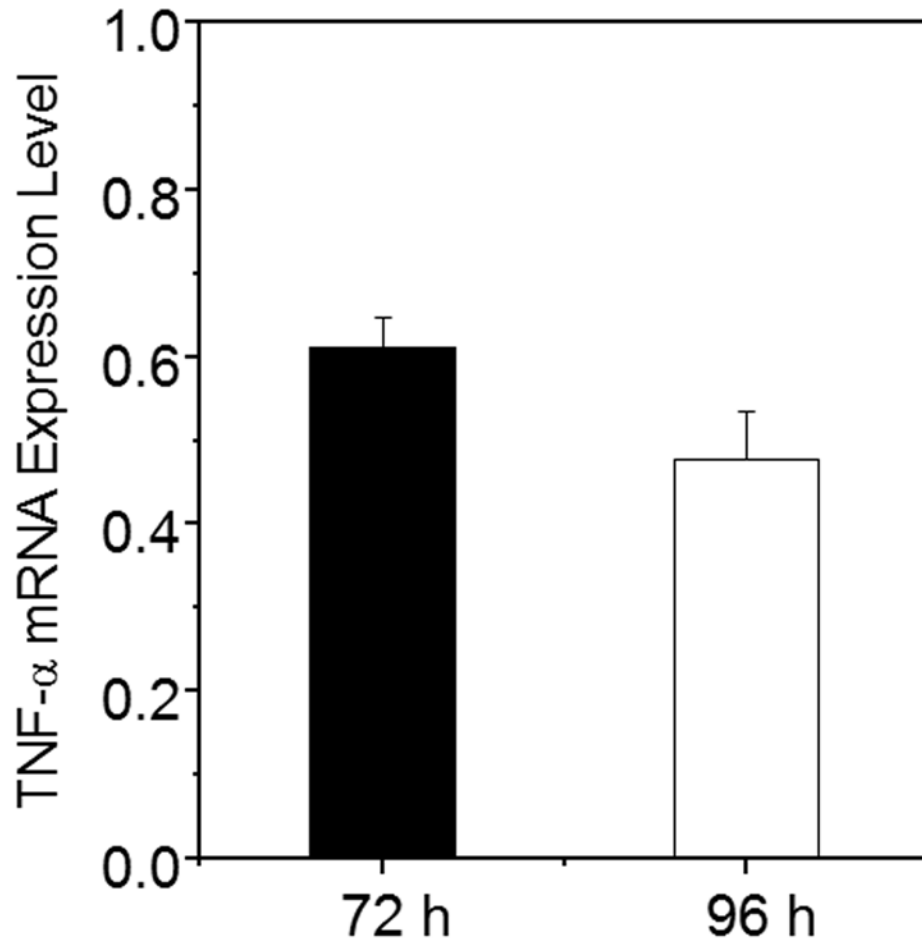

**Figure S2.** TNF- $\alpha$  mRNA expression levels in Raw 264.7 macrophages treated by HA-KPV-NPs for 72 h or 96 h. Each point represents the mean  $\pm$  S.E.M. (n=3).

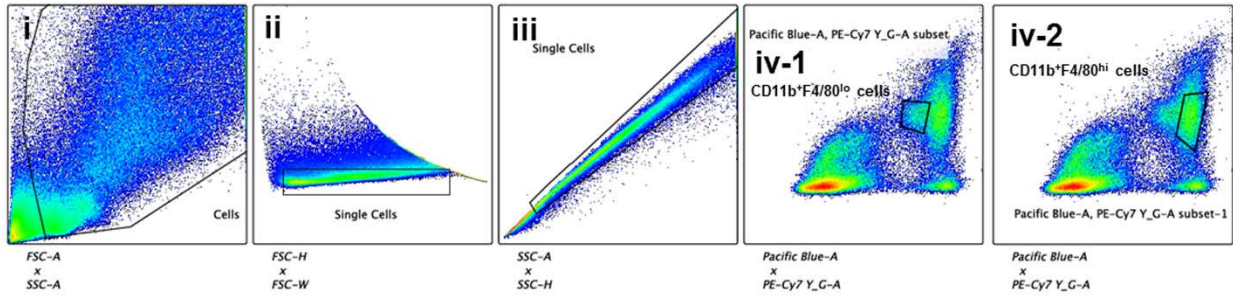

**Figure S3. Representative dot plots showing FCM gating processes to get macrophages (CD11b<sup>+</sup>F4/80<sup>lo</sup> and CD11b<sup>+</sup>F4/80<sup>hi</sup>) from mice treated with DSS and gavaged CM-loaded NPs.**

**Table S1. Primers used in this study.**

| Primer name      | Sequence                          | Description                                      |
|------------------|-----------------------------------|--------------------------------------------------|
| TNF- $\alpha$ -F | 5'-AGGCTGCCCCGACTACGT-3'          | Tumor necrosis factor gene RT-PCR forward primer |
| TNF- $\alpha$ -R | 5'-GACTTTCTCCTGGTATGAGATAGCAAA-3' | Tumor necrosis factor gene RT-PCR reverse primer |
| 36B4-F           | 5'-TCCAGGCTTTGGGCATCA-3'          | 36B4 gene RT-PCR forward primer                  |
| 36B4-R           | 5'-CTTTATCAGCTGCACATCACTCAGA-3'   | 36B4 gene RT-PCR reverse primer                  |
